# Supplementary material for: A higher ctDNA fraction decreases survival in regorafenib‐treated metastatic colorectal cancer patients. Results from the regorafenib's liquid biopsy translational biomarker phase II pilot study
Source: PubMed Central journal article supplement — Int J Cancer. 2020 Oct 16;148(6):1452–61. doi: 10.1002/ijc.33303 (PMC7894541; doi:10.1002/ijc.33303), 2020-10-16

**Figure S2. Genome-wide copy number profiles.** Shown are genome-wide copy number profiles established with the ichorCNA algorithm. Plotted are log<sub>2</sub>-ratios of read counts from 1 Mb bins. Blue indicated balanced region, green indicates losses of chromosomal material, red and brown indicated gain of chromosomal material. iTF, tumor fraction calculated from ichorCNA; BL, baseline plasma sample; EOT, plasma samples at the end of treatment; NA, sample not available

**R1\_BL: iTF 5.3%**

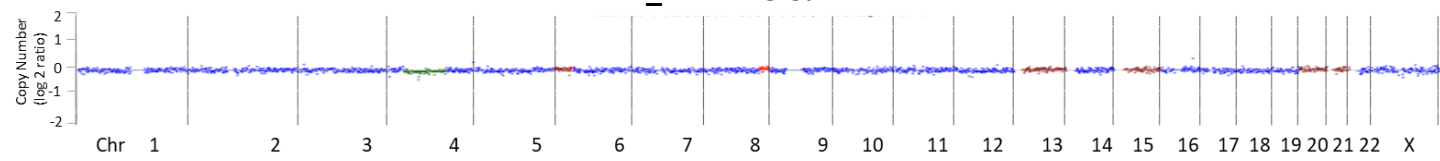

**R1\_EOT: iTF 4.1%**

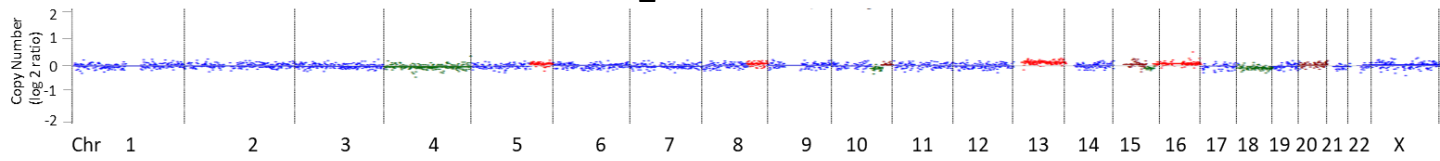

**R2\_BL: iTF 25.0%**

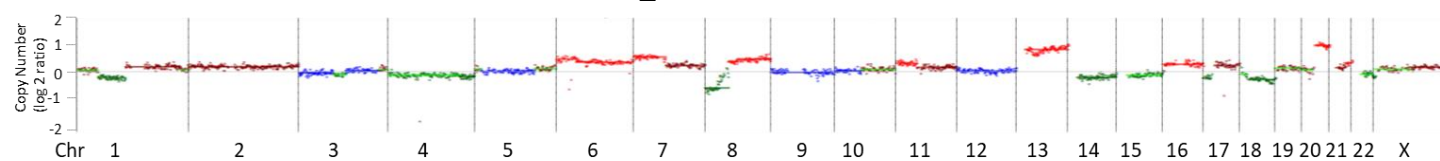

**R2\_EOT: iTF 35.4%**

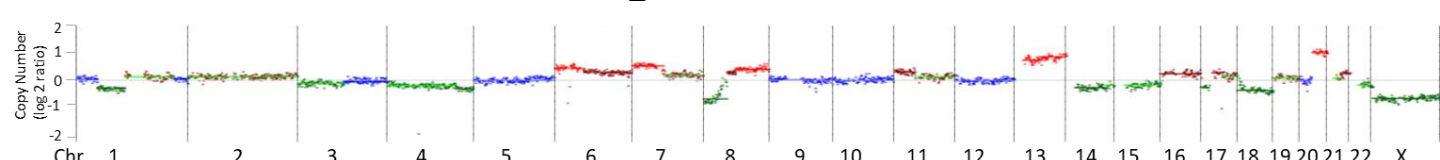

**R3\_BL: iTF 4.1%**

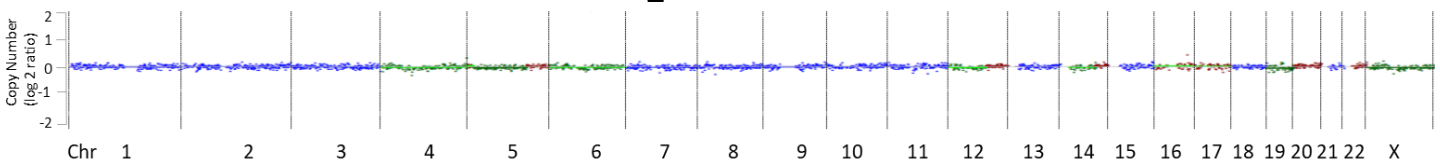

**R3\_EOT: iTF 0%**

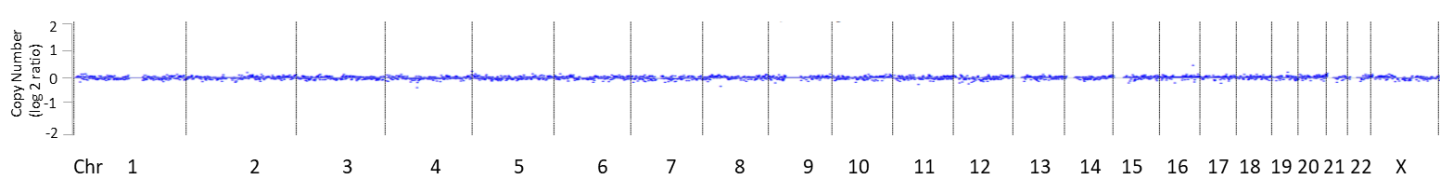

**R4\_BL: iTF 25.0%**

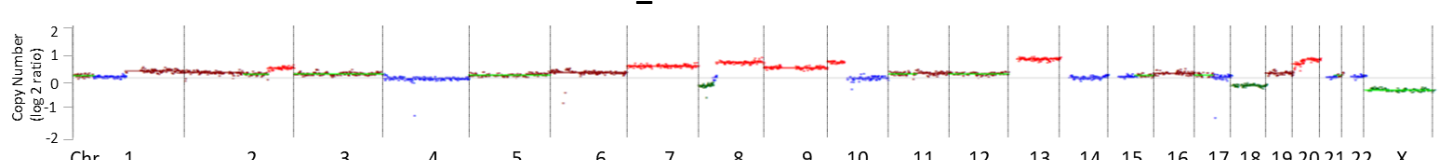

**R4\_EOT: iTF 50.6%**

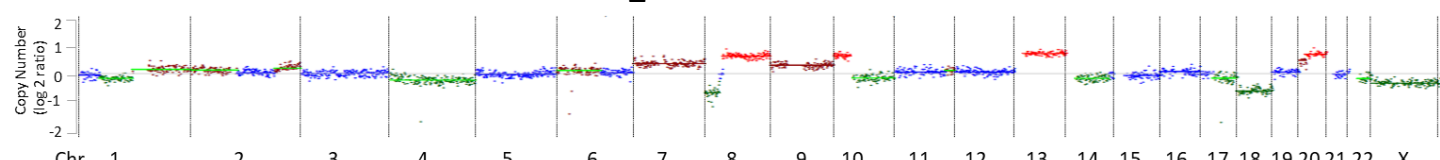

**R5\_BL: iTF 0%**

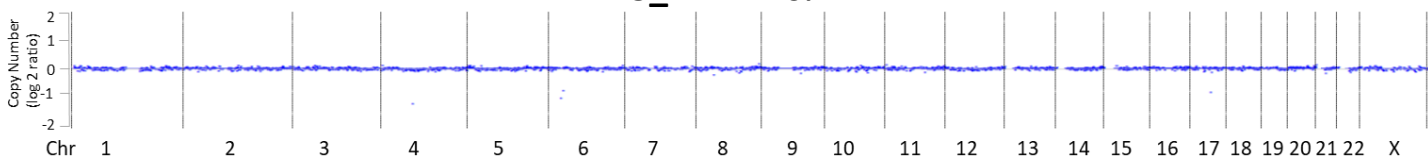

**R5\_EOT: iTF 8.7%**

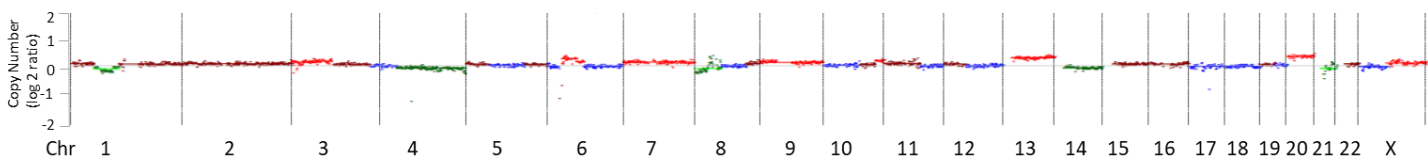

**R6\_BL: iTF 35.6%**

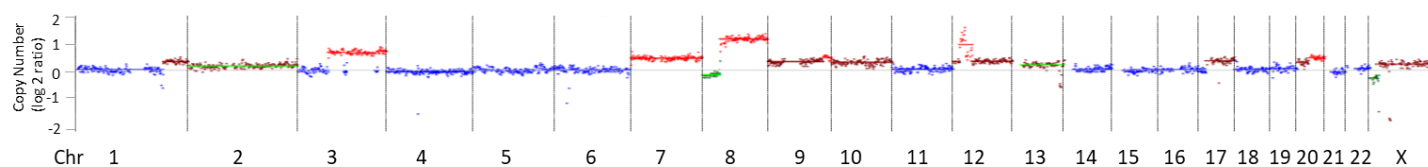

**R6\_EOT: NA**

**R8\_BL: iTF 24.3%**

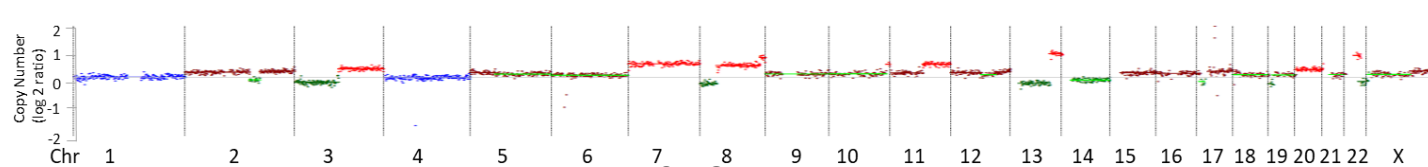

**R8\_EOT: NA**

**R9\_BL: iTF 23.7%**

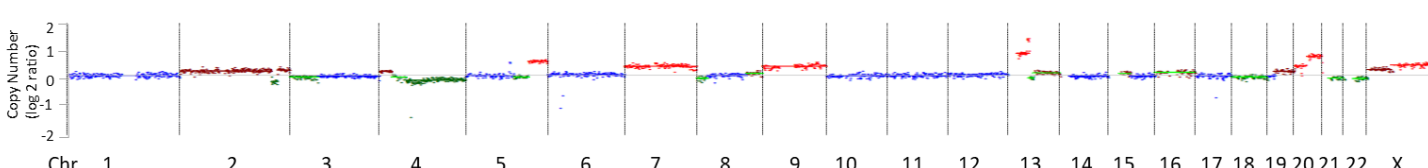

**R9\_EOT: NA**

**R10\_BL: iTF 5.7%**

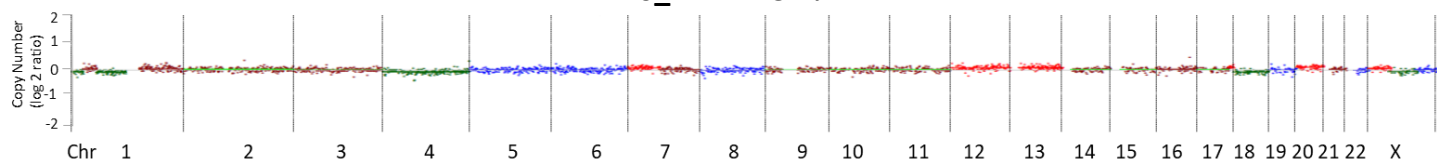

**R10\_EOT: NA**

**R11\_BL: iTF 8.2%**

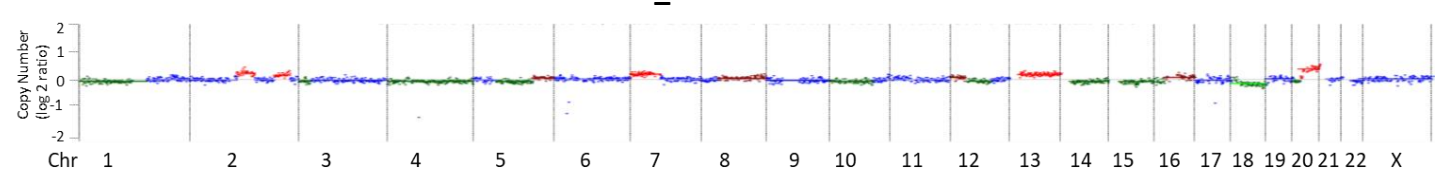

**R11\_EOT: 10.5%**

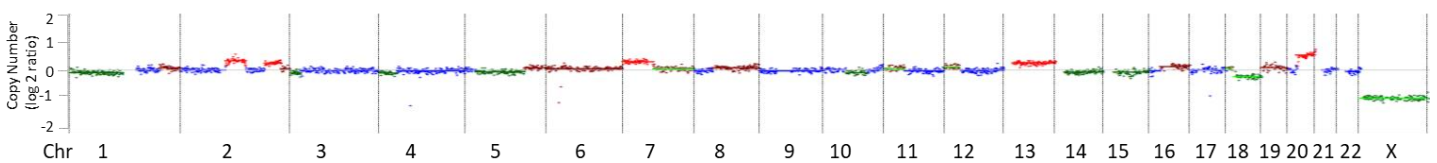

**R13\_BL: iTF 25.8%**

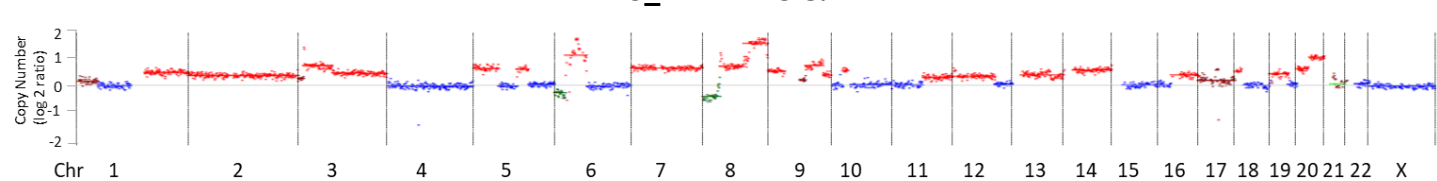

**R13\_EOT: NA**

**R14\_BL: iTF 24.7%**

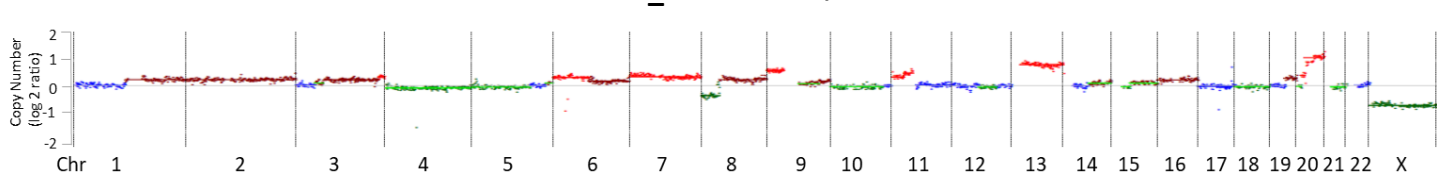

**R14\_EOT: iTF 45.1%**

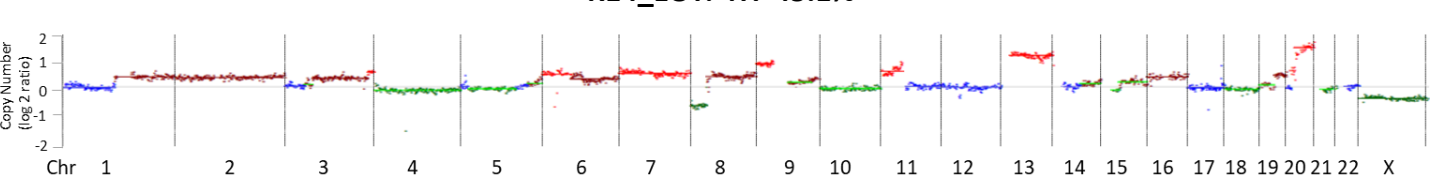

### R15\_BL: iTF 3.6%

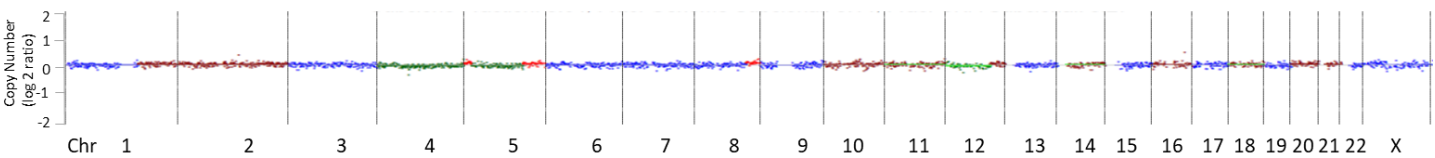

### R15\_EOT: iTF 6.2%

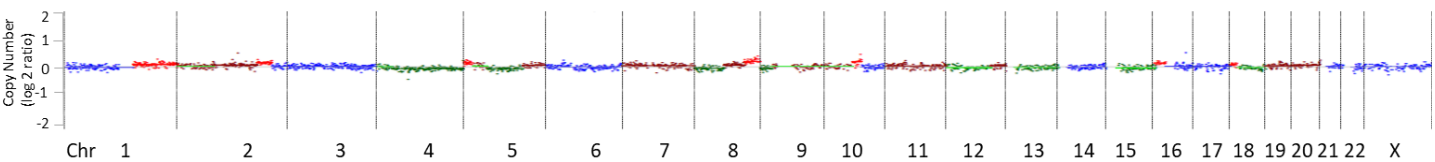

### R16\_BL: iTF 4.3%

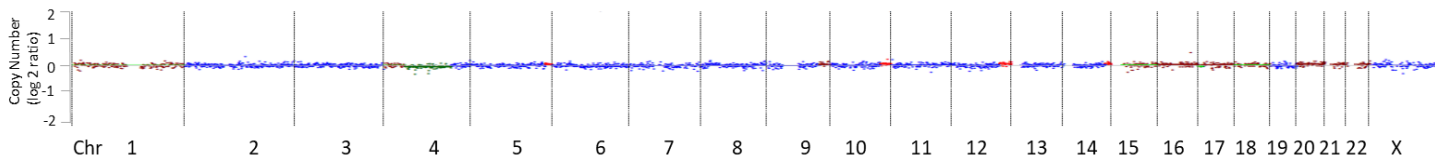

### R16\_EOT: iTF 4.3%

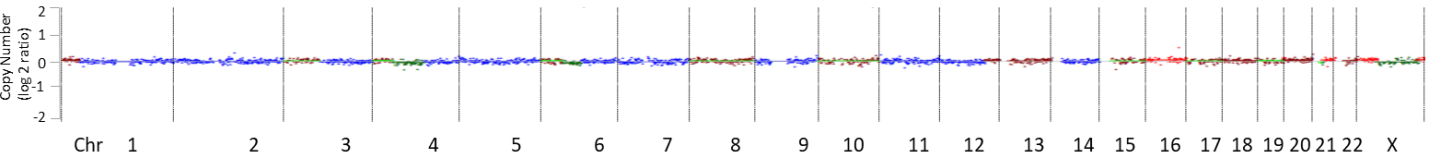

### R17\_BL: iTF 7.4%

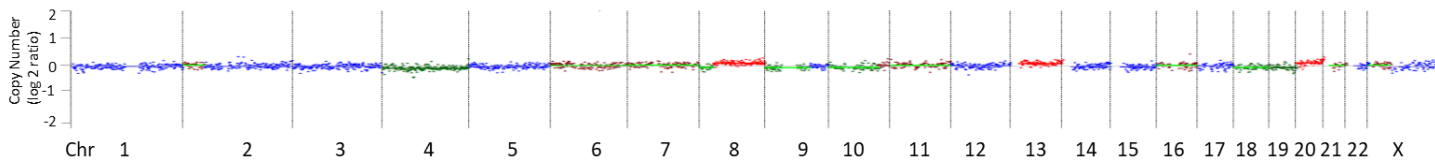

### R17\_EOT: 27.0%

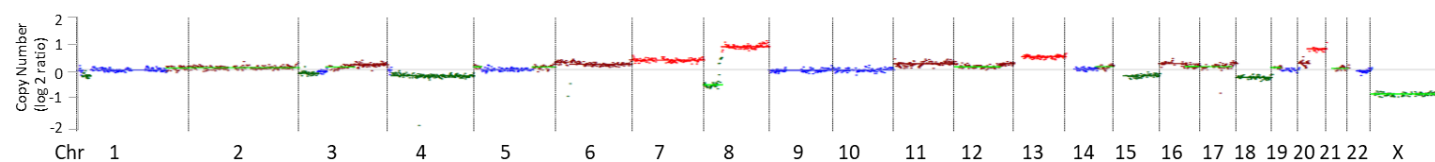

### R18\_BL: iTF 6.5%

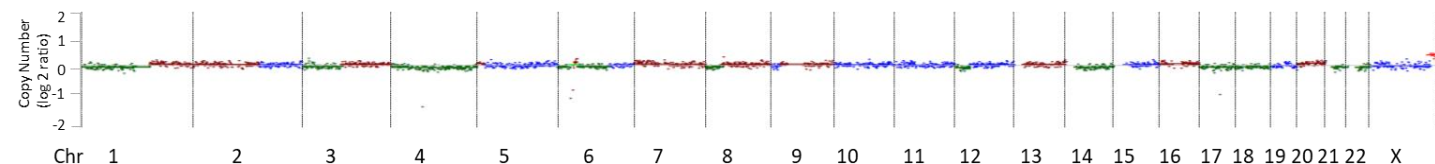

### R18\_EOT: NA

**R19\_BL: iTF 10.9%**

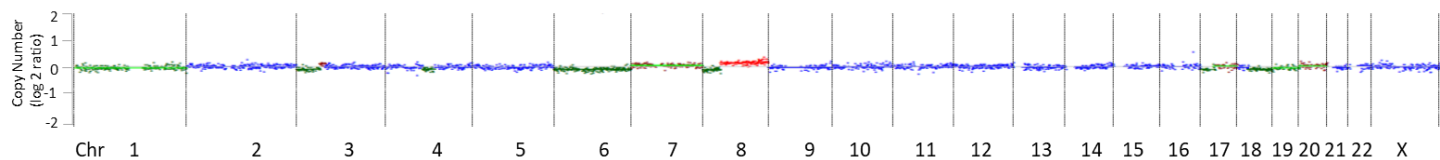

**R19\_EOT: iTF 3.8%**

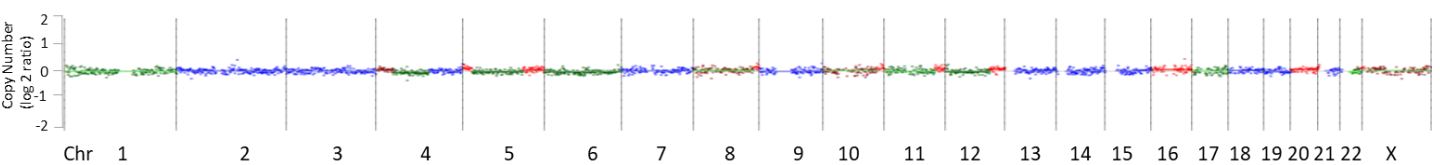

**R20\_BL: iTF 4.6%**

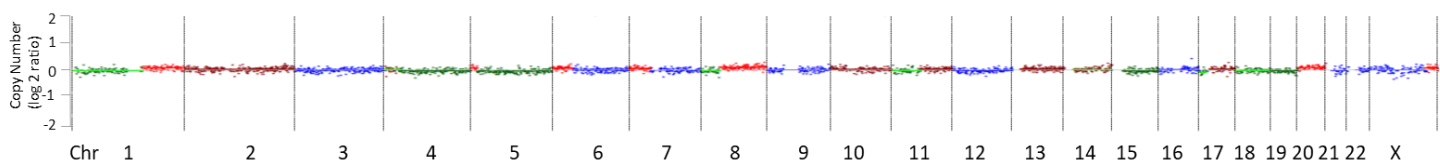

**R20\_EOT: 23.3%**

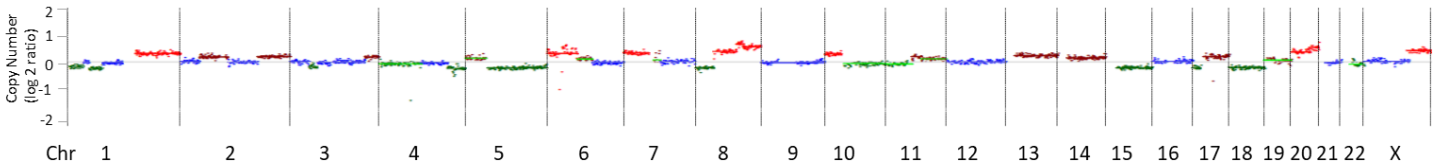

**R21\_BL: iTF 27.8%**

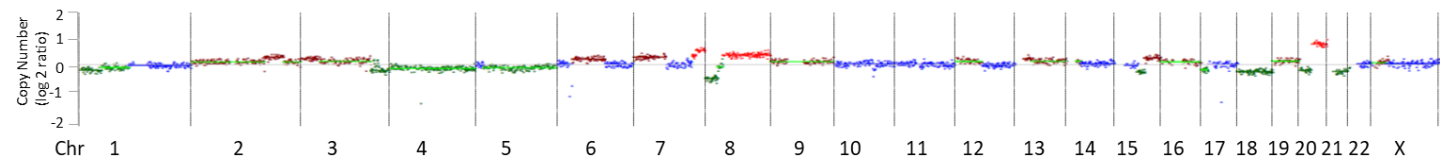

**R21\_EOT: 10.5**

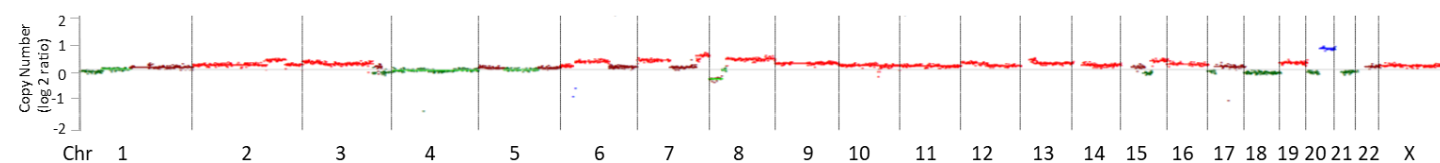

**R22\_BL: iTF 26.6%**

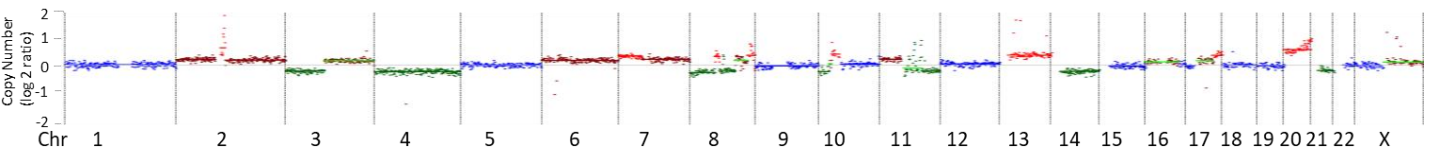

**R3\_EOT: NA**

**R23\_BL: iTF 42.9%**

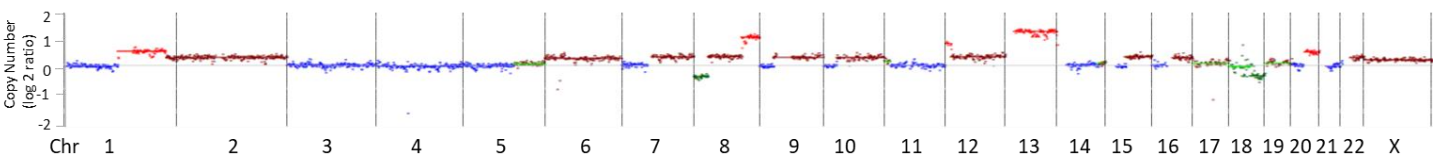

**R23\_EOT: iTF 60.3%**

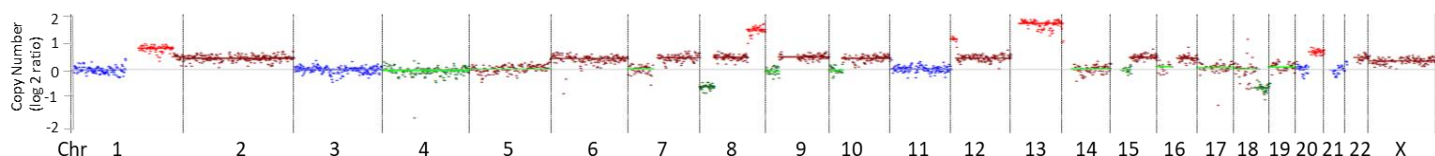

**R24\_BL: iTF 4.7%**

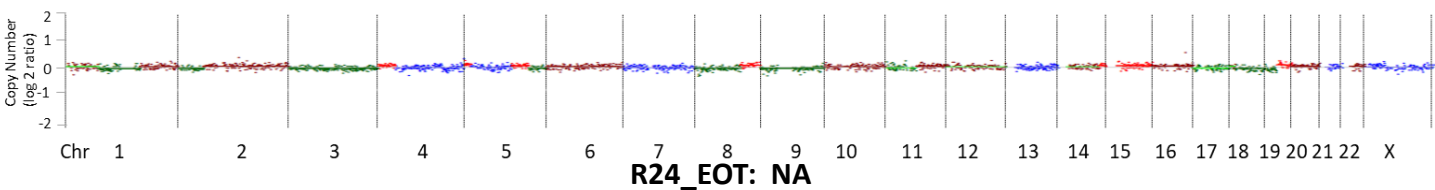

**R25\_BL: iTF 48.8%**

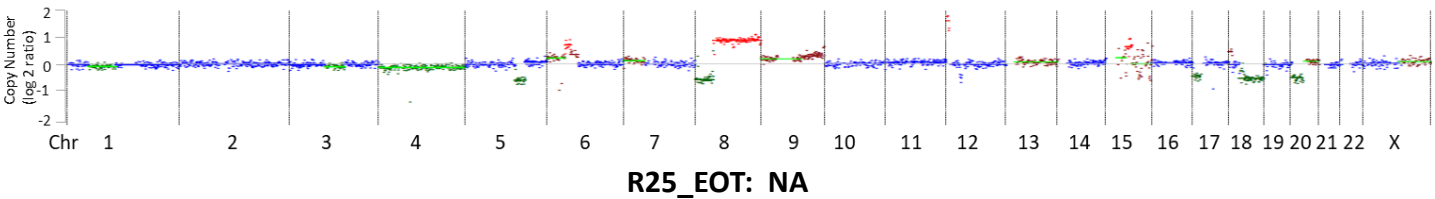

**R26\_BL: iTF 4.6%**

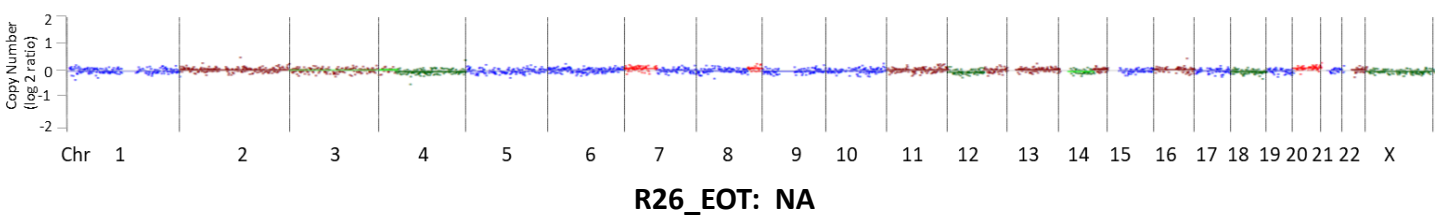

**R27\_BL: iTF3.1%**

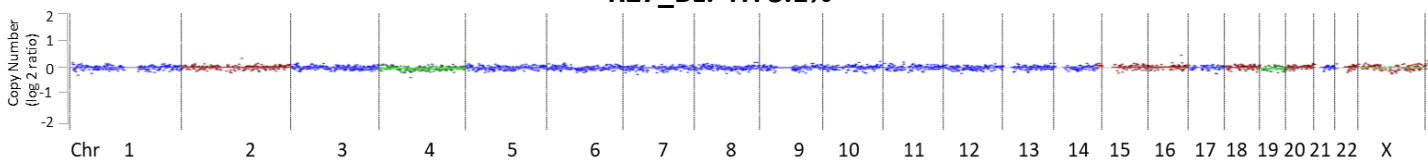

**R27\_EOT: NA**

**R28\_BL: iTF 4.5%**

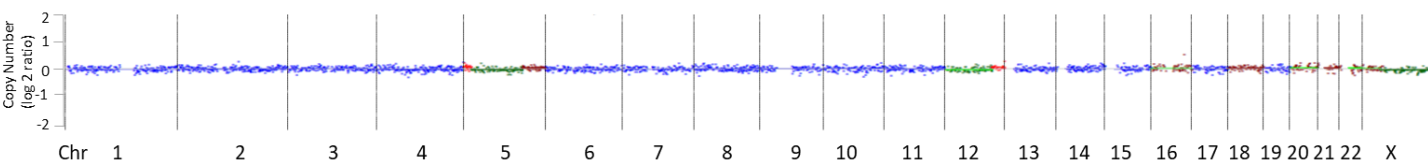

**R28\_EOT: 4.2%**

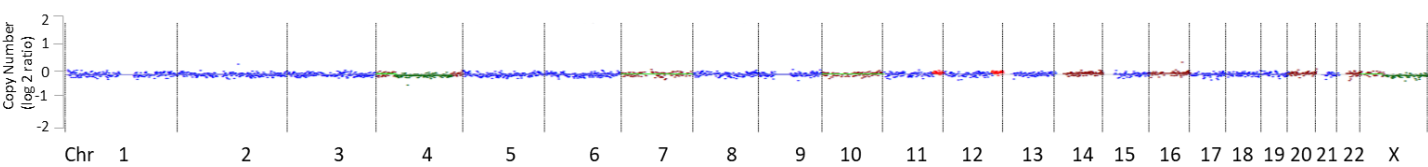

**R29\_BL: iTF28%**

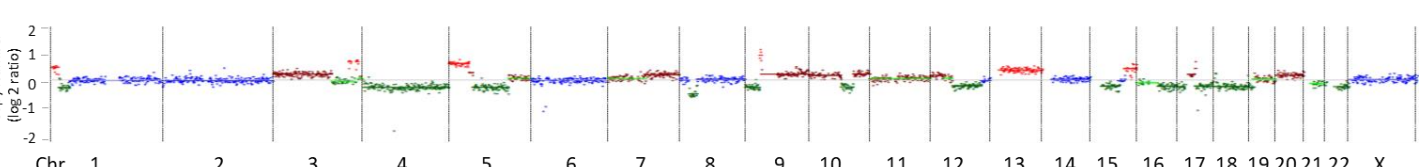

**R29\_EOT: NA**

**R31\_BL: iTF 5.2%**

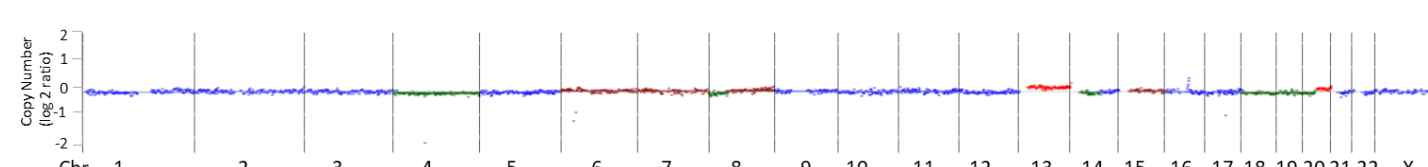

**R31\_EOT: NA**



**R32\_BL: iTF 15.6%**

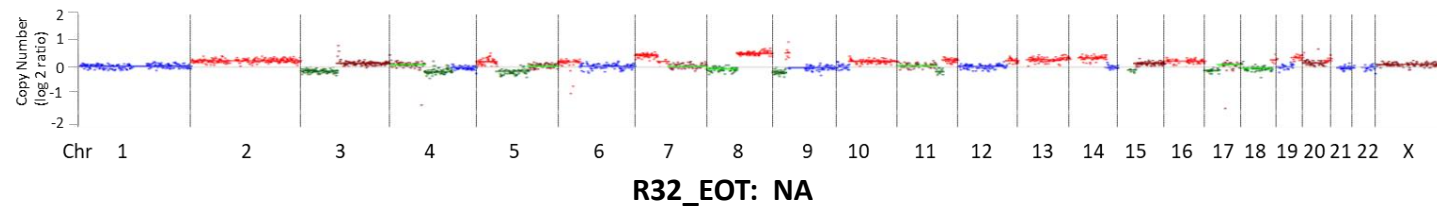

**R33\_BL: iTF 28.6%**

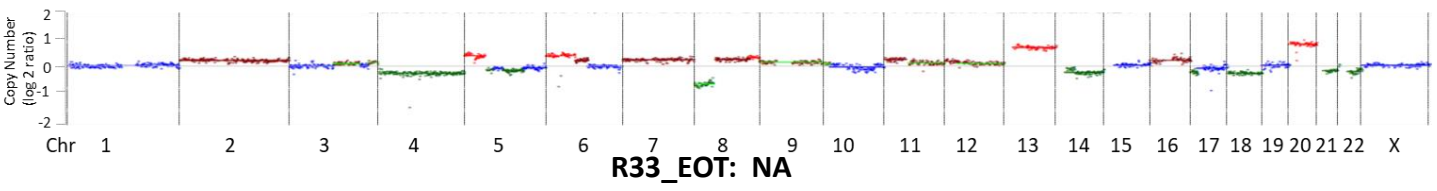

Supplement: IJC-148-1452-s002.pdf [file IJC-148-1452-s002.pdf]
