# Supplementary material for: A higher ctDNA fraction decreases survival in regorafenib‐treated metastatic colorectal cancer patients. Results from the regorafenib's liquid biopsy translational biomarker phase II pilot study
Source: PubMed Central journal article supplement — Int J Cancer. 2020 Oct 16;148(6):1452–61. doi: 10.1002/ijc.33303 (PMC7894541; doi:10.1002/ijc.33303), 2020-10-16
Supplement: IJC-148-1452-s001.pdf [file IJC-148-1452-s001.pdf]

## Supplementary material

### **A higher ctDNA fraction decreases survival in regorafenib-treated metastatic colorectal cancer patients. Results from the regorafenib's liquid biopsy (RELAIS) translational biomarker phase II pilot study.**

Matthias Unseld, Jelena Belic, Kerstin Pierer, Qing Zhou, Tina Moser, Raimund Bauer, Gudrun Piringer, Armin Gerger Alexander Siebenhüner, Michael Speicher, Ellen Heitzer, Gerald W. Prager

#### 1) Supplementary tables

*Table S1. Genes enriched using the SureSelect Custom Panel*

*Table S2. patients' characteristics*

*Table S3. Summary of mutation analysis using SureSelect (see Excel File)*

*Table S4. Summary of focal copy number alterations (see Excel File)*

#### 2) Supplementary figures

*Figure S1. Oncoprint*

*Figure S2. Copy number profiles from baseline and if available end of treatment (EOT) (see PDF file)*

*Figure S3. Correlation/Concordance of various proxies for ctDNA levels at baseline*

*Figure S4. Association of baseline ctDNA levels and presence of metastases.*

*Figure S5. ctDNA levels at baseline and before treatment cycle 2*

## 1) Supplementary tables:

*Table S1. Genes enriched using the SureSelect Custom Panel*

| Symbol         | Description*                                         | Symbol        | Description*                                                                  |
|----------------|------------------------------------------------------|---------------|-------------------------------------------------------------------------------|
| <i>ANGPT1</i>  | Angiopoietin 1                                       | <b>KRAS</b>   | <b>KRAS Proto-Oncogene, GTPase</b>                                            |
| <i>ANGPT2</i>  | Angiopoietin 2                                       | <i>MAPK1</i>  | Mitogen-Activated Protein Kinase 1                                            |
| <i>ANGPT4</i>  | Angiopoietin 4                                       | <i>MAPK11</i> | Mitogen-Activated Protein Kinase 11                                           |
| <b>APC</b>     | <b>Adenomatosis Polyposis Coli Tumor Suppressor</b>  | <i>MET</i>    | MET Proto-Oncogene, Receptor Tyrosine Kinase                                  |
| <b>BRAF</b>    | <b>B-Raf Proto-Oncogene, Serine/Threonine Kinase</b> | <i>MMP9</i>   | Matrix Metalloproteinase 9                                                    |
| <i>CDC42</i>   | Cell Division Cycle 42                               | <i>MRAS</i>   | Muscle RAS Oncogene Homolog                                                   |
| <i>COL18A1</i> | Collagen Type XVIII Alpha 1 Chain                    | <i>NFKB1</i>  | Nuclear Factor Kappa B Subunit 1                                              |
| <i>CUL1</i>    | Cullin 1                                             | <i>NFKB2</i>  | Nuclear Factor Kappa B Subunit 2                                              |
| <i>CXCL8</i>   | C-X-C Motif Chemokine Ligand 8                       | <b>NRAS</b>   | <b>NRAS Proto-Oncogene, GTPase</b>                                            |
| <i>CXCR1</i>   | C-X-C Motif Chemokine Receptor 1                     | <i>NRP1</i>   | Neuropilin 1                                                                  |
| <i>CXCR2</i>   | C-X-C Motif Chemokine Receptor 2                     | <i>NRP2</i>   | Neuropilin 2                                                                  |
| <i>CXCR4</i>   | C-X-C Motif Chemokine Receptor 4                     | <i>PDGFRA</i> | Platelet Derived Growth Factor Receptor Alpha                                 |
| <i>DDR2</i>    | Discoidin Domain Receptor Tyrosine Kinase 2          | <i>PDGFRB</i> | Platelet Derived Growth Factor Receptor Beta                                  |
| <i>DLL4</i>    | Delta Like Canonical Notch Ligand 4                  | <i>PIGF</i>   | Phosphatidylinositol Glycan Anchor Biosynthesis Class F                       |
| <i>EPHA2</i>   | EPH Receptor A2                                      | <b>PIK3CA</b> | <b>Phosphatidylinositol-4,5-Bisphosphate 3-Kinase Catalytic Subunit Alpha</b> |
| <i>ERBB2</i>   | Erb-B2 Receptor Tyrosine Kinase 2                    | <i>PLG</i>    | Plasminogen                                                                   |
| <i>FCGR2A</i>  | Fc Fragment Of IgG Receptor IIa                      | <i>PROK2</i>  | Prokineticin 2                                                                |
| <i>FGF2</i>    | Fibroblast Growth Factor 2                           | <i>PTEN</i>   | Phosphatase And Tensin Homolog                                                |
| <i>FGFR1</i>   | Fibroblast Growth Factor Receptor 1                  | <i>PTGS2</i>  | Prostaglandin-Endoperoxide Synthase 2                                         |
| <i>FGFR2</i>   | Fibroblast Growth Factor Receptor 2                  | <i>RAF1</i>   | Raf-1 Proto-Oncogene, Serine/Threonine Kinase                                 |
| <i>FGFR3</i>   | Fibroblast Growth Factor Receptor 3                  | <i>RBX1</i>   | Ring-Box 1                                                                    |
| <i>FGFR4</i>   | Fibroblast Growth Factor Receptor 4                  | <i>REL</i>    | REL Proto-Oncogene, NF-KB Subunit                                             |
| <i>FIGF</i>    | Vascular Endothelial Growth Factor D, FIGF           | <i>RELA</i>   | RELA Proto-Oncogene, NF-KB Subunit                                            |
| <i>FLT1</i>    | Fms Related Tyrosine Kinase 1                        | <i>RELB</i>   | RELB Proto-Oncogene, NF-KB Subunit                                            |
| <i>FLT4</i>    | Fms Related Receptor Tyrosine Kinase 4               | <i>RET</i>    | Ret Proto-Oncogene                                                            |
| <i>FRK</i>     | Fyn Related Src Family Tyrosine Kinase               | <i>SKP1</i>   | S-Phase Kinase Associated Protein 1                                           |
| <i>HGF</i>     | Hepatocyte Growth Factor                             | <b>SMAD4</b>  | <b>SMAD Family Member 4</b>                                                   |
| <b>HRAS</b>    | <b>HRAS Proto-Oncogene, GTPase</b>                   | <i>TEK</i>    | TEK Receptor Tyrosine Kinase                                                  |
| <i>IGF1</i>    | Insulin Like Growth Factor 1                         | <i>TIE1</i>   | Tyrosine Kinase With Immunoglobulin Like And EGF Like Domains 1               |
| <i>IGF1R</i>   | Insulin Like Growth Factor 1 Receptor                | <i>TNF</i>    | Tumor Necrosis Factor                                                         |
| <i>IL6</i>     | Interleukin 6                                        | <b>TP53</b>   | <b>Tumor Protein P53</b>                                                      |
| <i>JAK2</i>    | Janus Kinase 2                                       | <i>VEGFA</i>  | Vascular Endothelial Growth Factor A                                          |
| <i>KDR</i>     | Kinase Insert Domain Receptor                        | <i>VEGFC</i>  | Vascular Endothelial Growth Factor C                                          |
| <i>KIT</i>     | KIT Proto-Oncogene Receptor Tyrosine Kinase          | <i>VWF</i>    | Von Willebrand Factor                                                         |

\*according to GeneCards, most frequently mutated gene in CRC are highlighted in bold

Table S2. patients' characteristics

| Patient ID | Sex | Age | OS <sup>1</sup> [days] | PFS <sup>2</sup> [days] | Tumor            | Localization | Metastases |       |     |       | RAS mutation in tissue | RAS mutation in plasma | Duration of therapy with regorafenib | Response to treatment <sup>3</sup> | ECOG |
|------------|-----|-----|------------------------|-------------------------|------------------|--------------|------------|-------|-----|-------|------------------------|------------------------|--------------------------------------|------------------------------------|------|
|            |     |     |                        |                         |                  |              | Lung       | Liver | LN  | Other |                        |                        |                                      |                                    |      |
| R1         | m   | 49  | 1182                   | 195                     | rectum           | left-sided   | yes        | yes   | no  | 1     | KRAS G12C              | KRAS G12C              | 195                                  | SD                                 | 1    |
| R2         | m   | 75  | 1348                   | 132                     | sigmoid colon    | left-sided   | yes        | yes   | no  | no    |                        |                        | 132                                  | SD                                 | 0    |
| R3         | w   | 66  | 1034                   | 118                     | rectum           | left-sided   | yes        | yes   | no  | no    |                        |                        | 118                                  | SD                                 | 0    |
| R4         | m   | 66  | 1052                   | 86                      | rectum           | left-sided   | yes        | yes   | yes | no    | KRAS G13D              | KRAS G13D              | 86                                   | SD                                 | 0    |
| R5         | m   | 78  | 3555                   | 449                     | sigmoid colon    | left-sided   | yes        | yes   | yes | no    |                        | KRAS G12A              | 449                                  | SD                                 | 1    |
| R6         | m   | 59  | 1149                   | 58                      | coecum           | left-sided   | no         | yes   | yes | yes   | KRAS G12D              | KRAS G12D              | 58                                   | PD                                 | 0    |
| R8         | m   | 69  | 674                    | 28                      | rectum           | left-sided   | yes        | yes   | yes | yes   |                        |                        | 28                                   | EOT before CT                      | 1    |
| R9         | w   | 38  | 728                    | 34                      | sigmoid colon    | left-sided   | yes        | yes   | yes | yes   | KRAS G13D              | KRAS G13D              | 34                                   | EOT before CT                      | 1    |
| R10        | w   | 50  | 1305                   | 82                      | sigmoid colon    | left-sided   | no         | yes   | yes | no    | KRAS A146T             | KRAS A146T             | 82                                   | PD                                 | 0    |
| R11        | m   | 71  | 1284                   | 36                      | sigmoid colon    | left-sided   | yes        | no    | yes | no    |                        | KRAS Q61H              | 36                                   | PD                                 | 1    |
| R13        | w   | 70  | 1278                   | 26                      | sigmoid colon    | left-sided   | no         | yes   | no  | no    |                        |                        | 26                                   | PD                                 | 1    |
| R14        | m   | 52  | 1378                   | 99                      | ascending colon  | right-sided  | yes        | yes   | no  | no    | NRAS Q61R              | NRAS Q61R              | 99                                   | PD                                 | 0    |
| R15        | m   | 33  | 1306                   | 94                      | appendix         | right-sided  | no         | yes   | yes | yes   | KRAS G12D              | KRAS G12D              | 94                                   | PD                                 | 0    |
| R16        | m   | 68  | 1079                   | 63                      |                  | right-sided  | no         | yes   | yes | yes   |                        |                        | 63                                   | EOT before CT                      | 0    |
| R17        | m   | 78  | 750                    | 140                     | ascending colon  | right-sided  | no         | yes   | no  | no    |                        | KRAS G12A              | 140                                  | SD                                 | 0    |
| R18        | m   | 54  | 816                    | 84                      | rectum           | left-sided   | yes        | yes   | yes | yes   | KRAS G12V              | KRAS G12V              | 84                                   | SD                                 | 1    |
| R19        | m   | 70  | 255                    | 33                      | rectum           | left-sided   | no         | yes   | yes | yes   | KRAS G12D              | KRAS G12D              | 33                                   | EOT before CT                      | 1    |
| R20        | m   | 46  | 1242                   | 58                      | ascending colon  | right-sided  | yes        | yes   | yes | yes   |                        |                        | 58                                   | PD                                 | 0    |
| R21        | m   | 52  | 912                    | 85                      | rectum           | left-sided   | yes        | yes   | yes | no    |                        |                        | 85                                   | PD                                 | 0    |
| R22        | m   | 72  | 451                    | 30                      | rectum           | left-sided   | yes        | yes   | yes | yes   |                        |                        | 30                                   | PD                                 | 1    |
| R23        | m   | 48  | 700                    | 63                      | rectum           | left-sided   | yes        | yes   | yes | yes   | KRAS G12V              | KRAS G12V              | 63                                   | PD                                 | 1    |
| R24        | w   | 69  | 336                    | 43                      | ascending colon  | right-sided  | no         | yes   | yes | yes   |                        |                        | 43                                   | PD                                 | 0    |
| R25        | w   | 57  | 2325                   | 160                     | descending colon | left-sided   | yes        | yes   | yes | no    | KRAS G12D              | KRAS G12D              | 160                                  | PR                                 | 0    |
| R26        | m   | 56  | 458                    | 26                      | ascending colon  | right-sided  | yes        | yes   | yes | yes   |                        |                        | 26                                   | EOT before CT                      | 1    |
| R27        | m   | 62  | 1600                   | 79                      | ascending colon  | right-sided  | yes        | yes   | yes | yes   | KRAS G12D              |                        | 79                                   | PD                                 | 1    |
| R28        | w   | 68  | 352                    | 58                      | sigmoid colon    | left-sided   | yes        | yes   | yes | yes   | KRAS G12D              | KRAS G12D              | 58                                   | PD                                 | 1    |
| R29        | m   | 58  | 720                    | 17                      | ascending colon  | right-sided  | yes        | yes   | yes | yes   |                        |                        | 17                                   | EOT before CT                      | 1    |
| R31        | w   | 34  | 1499                   | 113                     | sigmoid colon    | left-sided   | yes        | yes   | yes | yes   |                        |                        | 113                                  | PD                                 | 0    |
| R32        | w   | 58  | 493                    | 21                      | rectum           | left-sided   | yes        | yes   | yes | no    |                        |                        | 21                                   | PD                                 | 0    |
| R33        | w   | 63  | 1305                   | 112                     | sigmoid colon    | left-sided   | yes        | yes   | yes | no    | KRAS G12S              | KRAS G12S              | 112                                  | PR                                 | 0    |

<sup>1</sup>OS, overall survival, <sup>2</sup>PFS, progression free survival, <sup>3</sup>PD, progressive disease; PR, partial response; SD, stable disease; EOT before CT, treatment was stopped due to side effects or progression before CT scan was scheduled; EOT before CT, clinical progress and/or death before a CT-scan

## 2) Supplementary Figures:

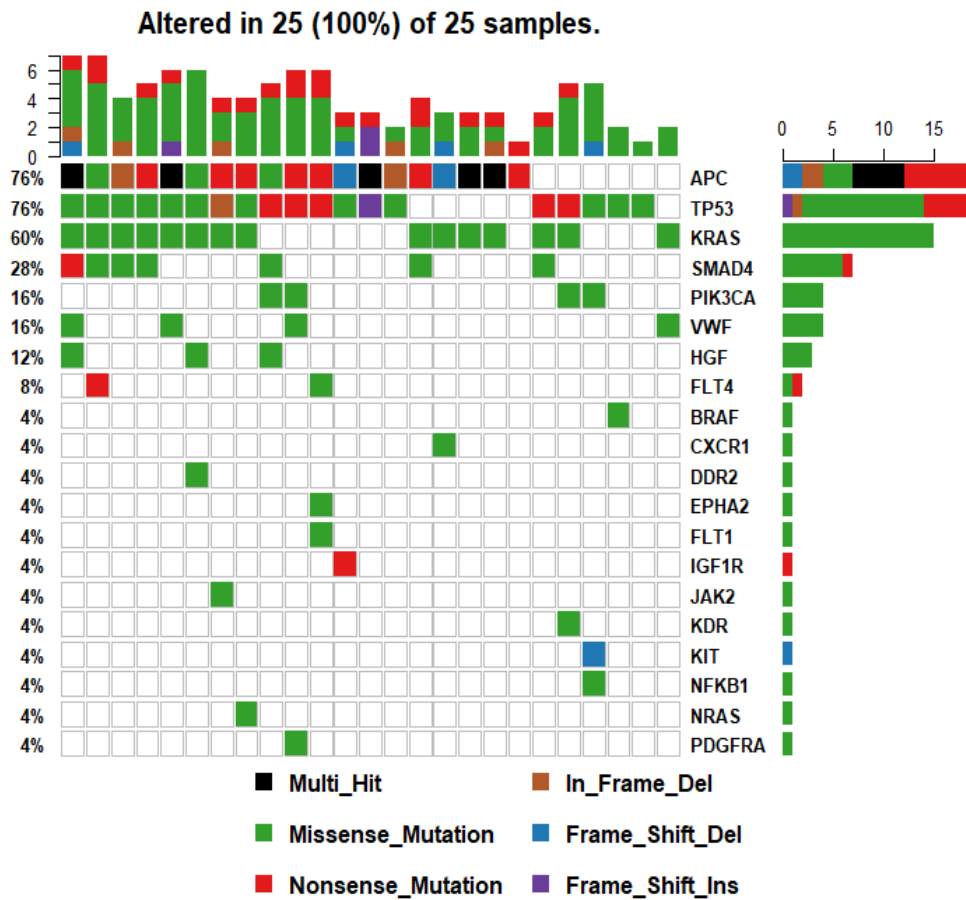

**Figure S1. Oncoprint.** Heatmap showing the distribution of genomic alterations in the mCRC cohort. In 25/30 patients at least one mutation was detected. Shown is an overview of genomic alterations (legend) in particular genes (rows) affecting individual samples (columns).

**(A)**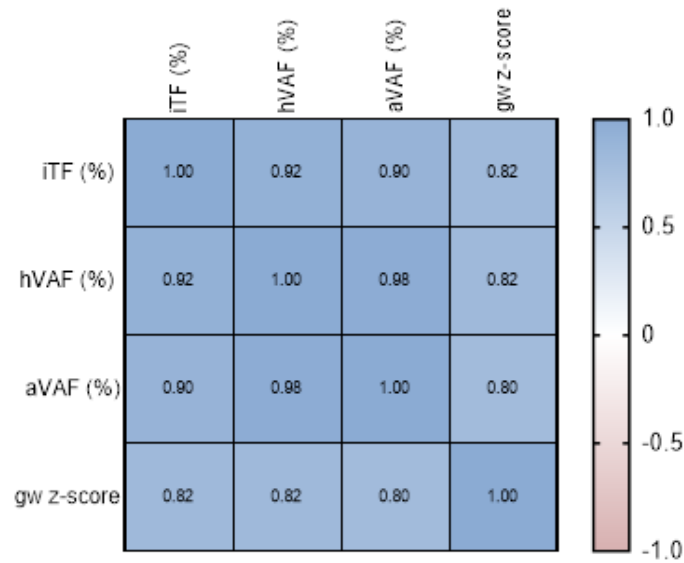**(B)**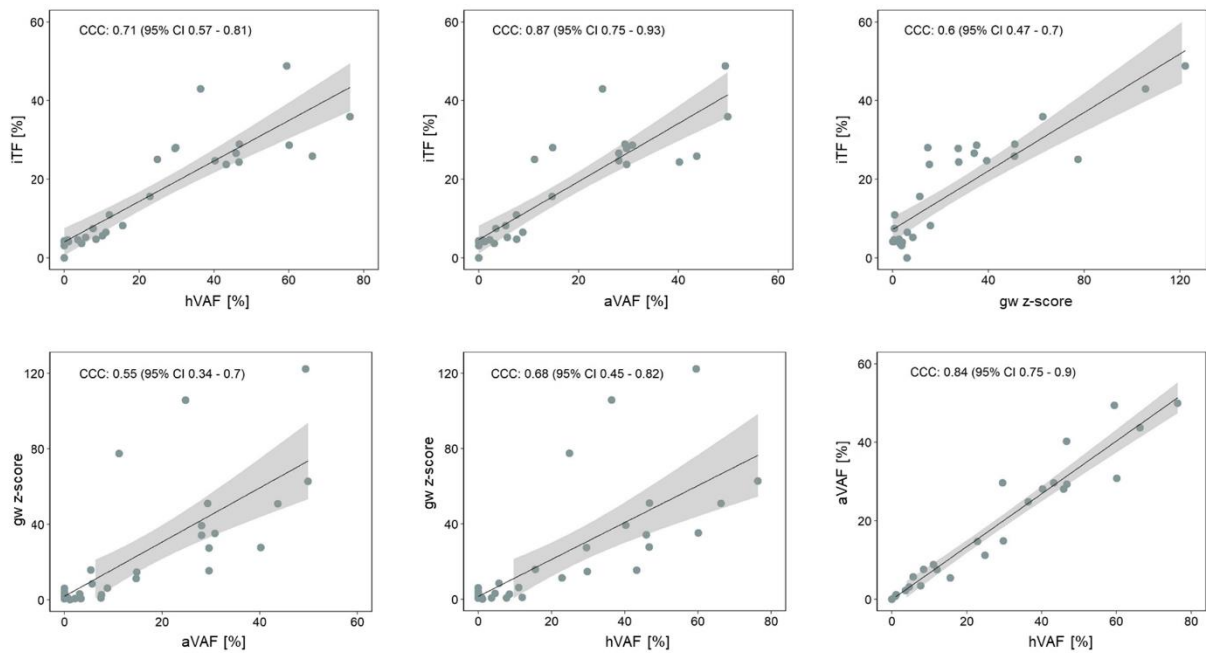

**Figure S3. Correlation/Concordance of various proxies for ctDNA levels at baseline.** (A) Heatmap representing the Spearman correlation coefficients of ctDNA level assessed with ichorCNA-derived tumor fraction (iTF), the highest variant allele (hVAF) frequencies from the SureSelect panel, the average variant allele (aVAF) frequencies from all mutations identified with the SureSelect panel and the genomewide z-score (gw z-score) calculated from mFAST-SeqS. (B) Shown are linear regression of the Linear regression of various proxies including the Lin's concordance coefficient (CCC).

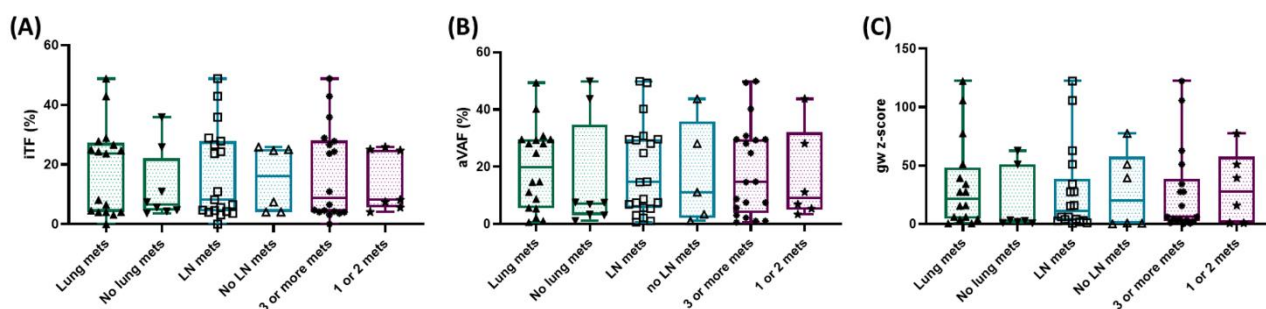

**Figure S4. Association of baseline ctDNA levels and presence of metastases.** Shown are box plots of ctDNA levels represented as (A) ichorCNA-derived tumor fraction (iTF) (B) with the average variant allele (aVAF) frequencies and (C) gw z-score. No significant difference was observed between patient with or without lung or lymph node (LN) metastases or three or more metastatic sites

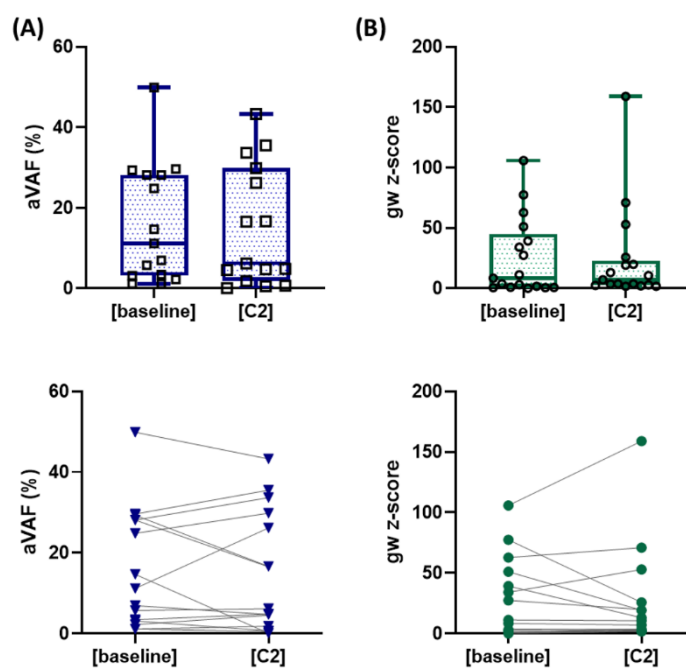

**Figure S5. ctDNA levels at baseline and before treatment cycle 2.** Upper panel: Distribution of various proxies for ctDNA levels prior to treatment initiation (baseline) and treatment cycle 2 (C2). (A) gw z-score, genomewide z-score calculated from mFAST-SeqS and (B) aVAF, average variant allele frequency (VAF) identified with the SureSelect panel. Lower panel: Changing levels of ctDNA reflected as (A) gw z-score and (B) aVAF
